# Supplementary material for: Epitaxial synthesis of Ni–MoS2/Ti3C2Tx MXene heterostructures for hydrodesulfurization
Source: Royal Society of Chemistry journal article supplement (doi:10.1039/d0ra01158d), 2020-01-01
Supplement: d0ra01158d1.pdf [file d0ra01158d1.pdf]

## Supplementary Information

### Epitaxial Synthesis of Ni-MoS<sub>2</sub>/Ti<sub>3</sub>C<sub>2</sub>T<sub>x</sub> MXene Heterostructures for Hydrodesulfurization

Mari Vinoba\*, R. Navvamani, Hanadi Al-Sheeha

Petroleum Research Center, Kuwait Institute for Scientific Research, Kuwait.

#### Materials

Titanium aluminum carbide (Ti<sub>3</sub>AlC<sub>2</sub>, Purity > 98 wt%) was provided by Hangzhou Dayangchem Co., Ltd., P. R. China. Analytical grade of ammonium heptamolybdate ((NH<sub>4</sub>)<sub>6</sub>Mo<sub>7</sub>O<sub>24</sub>·4H<sub>2</sub>O), nickel nitrate (Ni(NO<sub>3</sub>)<sub>2</sub>·4H<sub>2</sub>O), hydrofluoric acid (HF), thiophene and ammonium hydroxide solution were obtained from Sigma Aldrich and used without further purification. Milli-Q water was used to prepare solutions. The gas cylinders of 10 % H<sub>2</sub>S/Ar, 10 % H<sub>2</sub>S/H<sub>2</sub>, N<sub>2</sub>, and H<sub>2</sub> were purchased from Refrigeration & Oxygen Co. Ltd. Kuwait.

#### Characterization

The X-ray diffraction (XRD) patterns of Ti<sub>3</sub>AlC<sub>2</sub>, Ti<sub>3</sub>C<sub>2</sub>T<sub>x</sub>, and prepared catalysts were collected from PANalytical PW3040 (Cu-K $\alpha$  radiation,  $\lambda=0.1542$  nm) with X'pert PRO software to verify the formation of MXene from MAX phase. N<sub>2</sub> adsorption-desorption isotherms were measured at 77 K on Micromeritics ASAP 2020 for estimation of surface area, pore-volume, and pore diameter of catalysts. The number of MoS<sub>2</sub> layers formed in the catalysts was calculated from Raman spectroscopy on Senterra, Bruker. The catalysts were analyzed by HRTEM using a JEOL-2000EX operated at 120 kV. The surface morphology and distribution of active metals of the target catalysts

were obtained by scanning electron microscopy (SEM) with energy dispersive spectroscopy (EDS) using a JEOL-JSM-IT300 with Oxford-EDS. To understand the surface-active metal binding energies of catalyst by X-ray photoelectron spectroscopy (XPS), Thermo Scientific K-Alpha spectrometer. H<sub>2</sub> temperature-programmed reduction (H<sub>2</sub>-TPR) of the catalysts was conducted with AMI-300S, Altamira Inc, USA.

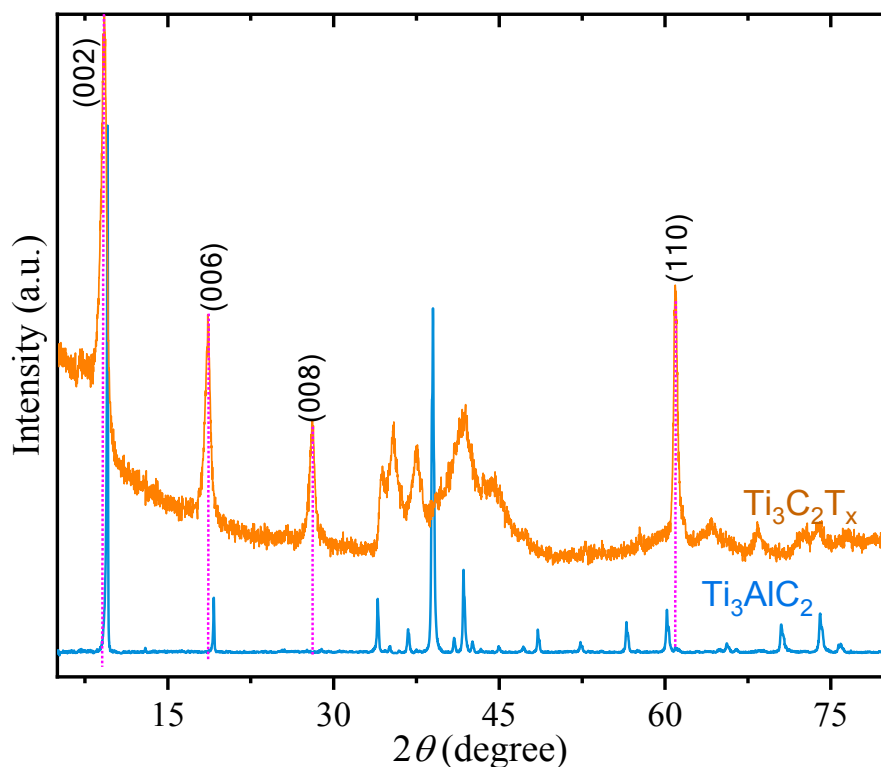

**Fig. S1** XRD diffraction patterns of MAX phase (Ti<sub>3</sub>AlC<sub>2</sub>) and Ti<sub>3</sub>C<sub>2</sub>T<sub>x</sub> MXene.

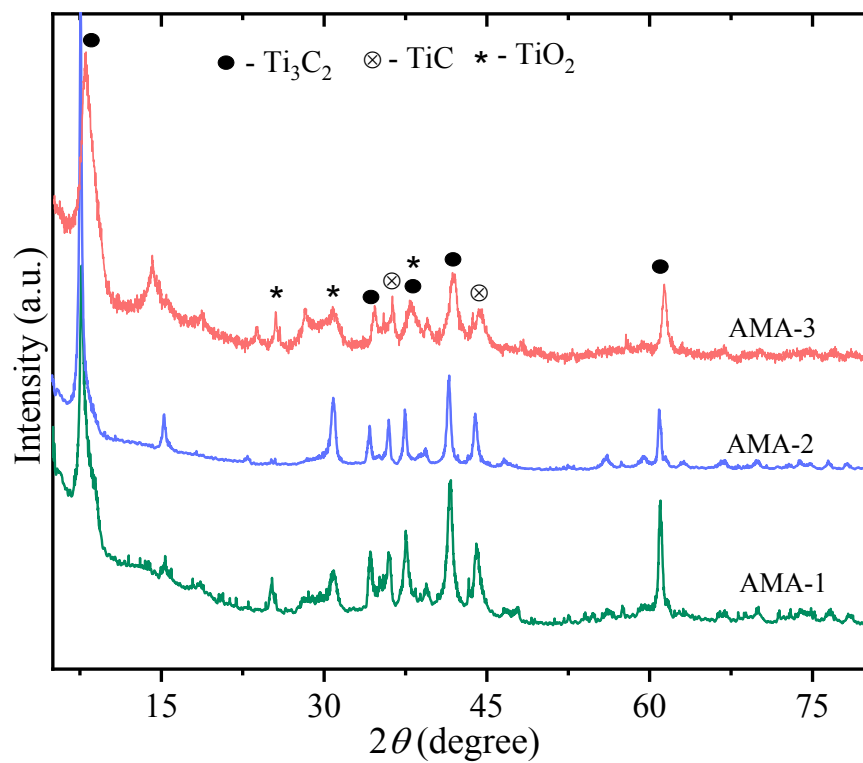

**Fig. S2** XRD diffraction patterns of MoS<sub>2</sub>/Ti<sub>3</sub>C<sub>2</sub>T<sub>x</sub> (AMA) at different Mo loading.

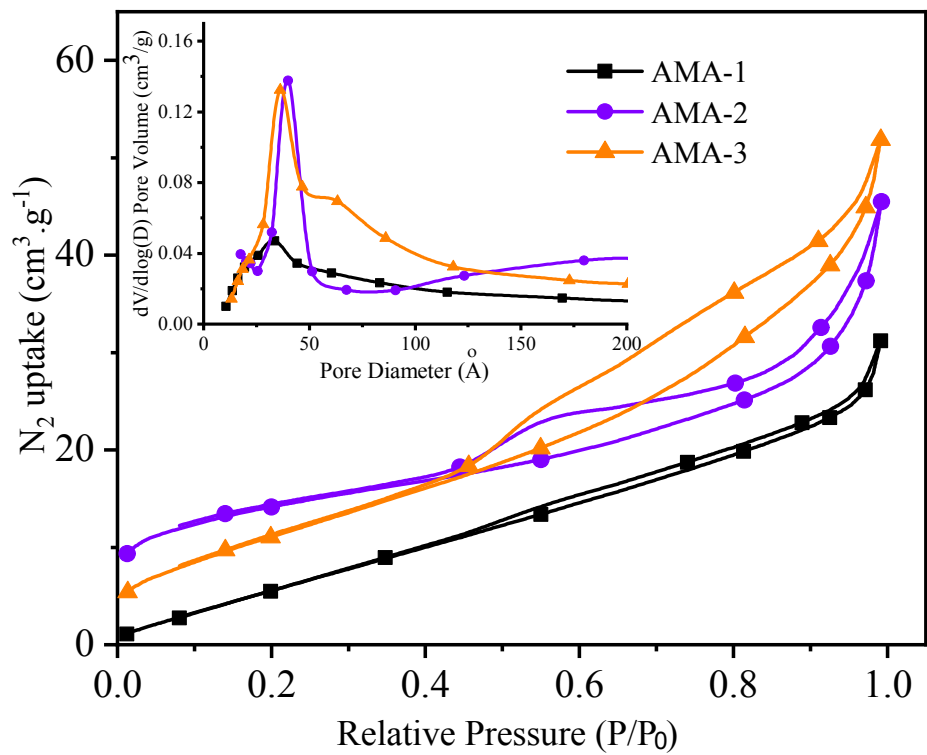

**Fig. S3** The textural properties of AMA catalysts, and ascribed to their hysteresis loop and pore size.
